# Supplementary material for: Deciphering how Cpl-7 cell wall-binding repeats recognize the bacterial peptidoglycan
Source: PubMed Central journal article supplement (PMC5705596; doi:10.1038/s41598-017-16392-4), 2017-11-28
Supplement: 41598_2017_16392_MOESM1_ESM.pdf [file 41598_2017_16392_MOESM1_ESM.pdf]

## Supplementary Information

# Deciphering how Cpl-7 cell wall-binding repeats recognize the bacterial peptidoglycan

**Noemí Bustamante<sup>1,2‡</sup>, Manuel Iglesias-Bexiga<sup>1,2‡</sup>, Noelia Bernardo-García<sup>1</sup>, Noella Silva-Martín<sup>1</sup>, Guadalupe García<sup>1,2</sup>, María A. Campanero-Rhodes<sup>1,2</sup>, Esther García<sup>2,3</sup>, Isabel Usón<sup>4</sup>, Rubén M. Buey<sup>5</sup>, Pedro García<sup>2,3</sup>, Juan A. Hermoso<sup>1</sup>, Marta Bruix<sup>1</sup>, Margarita Menéndez<sup>1,2\*</sup>**

<sup>1</sup>Instituto de Química-Física Rocasolano, Consejo Superior de Investigaciones Científicas, Serrano 119, 28006, Madrid, Spain.

<sup>2</sup>CIBER de Enfermedades Respiratorias (CIBERES).

<sup>3</sup>Centro de Investigaciones Biológicas, Consejo Superior de Investigaciones Científicas, Ramiro de Maeztu 9, 28040, Madrid, Spain.

<sup>4</sup>Instituto de Biología Molecular de Barcelona, CSIC, Baldiri Reixach 13, 08028 Barcelona, Spain, and ICREA (Institució Catalana de Recerca i Estudis Avançats)

<sup>5</sup>Metabolic Engineering Group. Departamento de Microbiología y Genética, Universidad de Salamanca, Campus Miguel de Unamuno, 37007, Salamanca, Spain.

\*Correspondence to: Margarita Menéndez ([mmenendez@iqfr.csic.es](mailto:mmenendez@iqfr.csic.es)).

‡These authors contributed equally to this work.

## Supplementary methods

### Crystallization

Crystallization was performed using a high-throughput NanoDrop™ ExtY robot (Innovadyne Technologies Inc., California, USA). The initial crystallization screening kits were JCSG+ Suite, PACT Suite (Qiagen, Düsseldorf, Germany), Index HT and Crystal Screen (Hampton Research, Aliso Viejo, California, USA). All crystallization nano-trials were performed by the sitting-drop vapour-diffusion method at 291K using Innovaplate™ SD-2 microplates (Innovadyne Technologies Inc.). Crystallization was performed mixing equal amounts (250 nl) of protein (20 mg ml<sup>-1</sup> in 25 mM Tris, 100 mM NaCl, pH 8) and precipitant solutions. NanoDrop robot drops (500 nl, protein and precipitant solutions) were equilibrated against 65 µl of mother liquor.

Small crystals grew from C-Cpl-7 wt protein isolated from LSLt-C-Cpl-7 construction in condition B11 from JCSG Suite, consisting in a reservoir solution of 1.3 M tri-sodium citrate. Positive results were scaled up using the hanging-drop vapour-diffusion method in Linbro plates (Hampton Research). Drops were prepared by mixing 2 µl protein solution with 2.5 µl reservoir solution, including 0.5 µl 1M HEGA-8 (Octanoyl-N-hydroxyethylglucamide) from Detergent Screen (Hampton Research) as additive, equilibrating against 500 µl crystallization solution in the reservoir. Optimized crystals grew in 1.3 M tri-sodium citrate.

Crystals from the full-length protein C-Cpl-7R, in which arginines 223, 271 and 319 are mutated to alanine, were obtained by mixing 2 µl protein solution with 2.5 µl reservoir solution supplemented with 0.5 µl 1M HEGA-8 as an additive, equilibrating against 500 µl crystallization solution in the reservoir. Crystals grew in 1.1 M tri-sodium citrate.

**X-ray data collection and structural determination.** Both types of crystals were soaked for a few seconds in a cryoprotectant solution (20% v/v glycerol diluted in crystallization mother liquor) prior to flash-cooling at 100 K in liquid nitrogen. X-ray data sets were collected using an ADSC (Area Detector Systems Corporation) Quantum Q315r detector on beamline ID 14-1 ( $\lambda = 0.934 \text{ \AA}$ ) at the ESRF (Grenoble, France) for C-Cpl-7 wt (R<sub>1-2</sub>, see below) crystals, and a PILATUS 6M detector on XALOC beamline BI-13-XALOC ( $\lambda = 1.05739 \text{ \AA}$ )<sup>1</sup> at ALBA synchrotron (Barcelona, Spain) for those of C-Cpl-7R.

An X-ray data set was collected to 1.67 Å resolution from a C-Cpl-7 wt crystal. It belonged to the hexagonal space group  $P6_1$ , with unit-cell parameters  $a = 50.40$ ,  $b = 50.40$ ,  $c = 28.55 \text{ \AA}$ . Despite the fact that the complete C-Cpl-7 wt domain was isolated from the fusion protein LSLt-C-Cpl-7wt, the size and symmetry of the unitary cell were incompatible with the presence of the three repeats in the crystallised fragment. The analysis of its N-terminal sequence (GEFNNT) and molecular mass (12,156 Da) showed that it was made up of the R1 and R2 repeats (R<sub>1-2</sub> fragment; see Supplementary Fig.S4), likely due to the hydrolysis of the R3 repeat during crystallisation. Besides, considering the cell volume, the Matthews coefficient calculated for a single repeat and the inter-repeat connecting linker ( $2.34 \text{ \AA Da}^{-1}$ ), and for a solvent content of 47.40 %, the spatial group ( $P6_1$ ) would admit only one of the two identical repeats (referred to as R2) within the cell-unit. Crystals from the full-length C-Cpl-7R yielded a X-ray data set that diffracted up to 2.8 Å resolution. The crystal belonged to the orthorhombic space group  $P2_12_12_1$ , with unit-

86.10 Å. Data sets were processed using *XDS* (Kabsch 1988) and *iMOSFLM* and scaled using *AIMLESS* from CCP4 program suite<sup>2</sup>.

R2 structure was solved with *ARCIMBOLDO*<sup>3</sup> on a large number of alternative fragments derived from random trimming of PDB entries containing partial structures with the highest sequence similarity. The successful attempt was part of a pool of trials with polyalanine fragments made up of 114 residues cut from the entry. C-Cpl-7R structure was determined by using R2 structure as initial model in the molecular replacement method using *MOLREP*<sup>4</sup>.

Manual model building was performed using *COOT*<sup>5</sup>. Models were refined using *PHENIX* suite<sup>6</sup>. Excellent density maps were obtained for the single repeat R2 structure (Supplementary Fig. S6), and refinement converged to the final values of  $R = 0.17$  and  $R_{\text{free}} = 0.22$  for the R2 structure. The full-length C-Cpl-7R structure also presented an excellent electron density map along the sequence, except for the last residue of the polypeptide chain. One glycerol molecule, used as cryoprotectant, was identified in the electron density map involved in crystal contacts. Refinement of C-Cpl-7R resulted in an R factor of 0.20 and  $R_{\text{free}}$  of 0.29.

**Docking studies.** Flexible docking of the GMDP mucopeptide to R2 wild-type structure was carried out using four different methods (CRDOCK, DOCK6.3, AutoDock4.2 and AutoDock-Vina) with distinct docking and scoring algorithms. CRDOCK applies the matching triangle docking method<sup>7</sup>. The conformational sampling of the ligand was performed by clustering, after 100 ps equilibration and 20 ns molecular dynamic simulation of the molecule immersed into explicit solvent using the sander module of AMBER12 suite<sup>8</sup>. The receptor was treated as a rigid molecule, and a three-dimensional grid ( $50 \times 50 \times 50$  points) with 0.5 Å of grid spacing was centered on the position occupied by the N $\eta$ 2 atom of the Arg271 side chain. Sigmoidal distance-dependent dielectric constants and original Lennard–Jones and hydrogen-bonding potentials were employed to create the grid maps used to dock every GMDP conformer in the receptor. The 50 lowest energy poses were ranked according to a combination of CRDOCKscore, ChemScore and RankScore implemented by the CRDOCK program. The DOCK6.3 method uses the anchor and grow methodology. The ligand and the grid maps were prepared by using automated protocols implemented in the UCSF Chimera software<sup>9</sup>. Grid location and dimensions were as in the CRDOCK protocol, but the spacing parameter was 0.3 Å. The default parameters for flexible docking and final minimization were maintained during docking calculations, and the 20 poses with lowest energy scores were clustered as the best CRDOCK docking solutions. AutoDock4.2 implements the Lamarckian genetic algorithm (LGA) which combines local search and a genetic algorithm<sup>10</sup>. All the active torsion angles of the ligand were allowed to rotate during docking, and the structure of the receptor was converted to pdbqt (AutoDock) format, conserving the partial charges, using AutoDock4 Tools program. The grid box was generated with  $40 \times 40 \times 40$  points at 0.375 Å resolution and the grid center was, again, the N $\eta$ 2 atom of Arg271. The docking was performed with 250 runs, a population size of 300,  $2.5 \times 10^7$  energy evaluations, and default values for the other docking parameters. The 25 solutions with lowest energy were selected. The fourth method, AutoDock-Vina (version 1.1.2), is based on a variety of stochastic global optimization

approaches, including genetic algorithms, particle swarm optimization and simulated annealing, between others, combined with several local optimization procedures<sup>11</sup>. The coordinates for the center of the grid were those used in the other approaches and grid dimensions were  $16 \times 16 \times 16 \text{ \AA}$ . The exhaustiveness of the docking was increased to 16 binding modes and the 20 lowest-energy solutions were considered for further analysis.

## References

1. Juanhuix, J. *et al.* Developments in optics and performance at BL13-XALOC, the macromolecular crystallography beamline at the Alba Synchrotron. *J. Synchrotron Radiat.* **21**, 679–689 (2014).
2. Baley, S. The CCP4 suite, programs for protein crystallography. *Acta Cryst. D***50**, 157–163, (1994).
3. Millán, C., Sammito, M. & Usón I. Macromolecular *ab initio* phasing enforcing secondary and tertiary structure. *IUCr J.* **2**, 95–105 (2015).
4. Vagin, A. & Teplyakov, A. Molecular replacement with MOLREP. *Acta Cryst. D***66**, 22–25 (2010).
5. Emsley, P. & Cowtan, K. Coot: model-building tools for molecular graphics. *Acta Cryst. D* **60**, 2126–2132 (2004)
6. Adams, P. D. *et al.* PHENIX: a comprehensive Python-based system for macromolecular structure solution. *Acta Cryst. D***66**, 213–221 (2010).
7. Cabrera, A. C. *et al.* CRDOCK: An ultrafast multipurpose protein-ligand docking tool. *J. Chem. Inf. Model* **52**, 2300–2309 (2012) Case, D.A. *et al.* AMBER 12, University of California, San Francisco (2012).
8. Pettersen, E. F. *et al.* UCSF Chimera—a visualization system for exploratory research and analysis. *J. Comput. Chem.* **25**, 1605–1612 (2004).
9. Morris, G. M. *et al.* AutoDock4 and AutoDockTools4: Automated docking with selective receptor flexibility. *J. Comput. Chem.* **30**, 2785–2791 (2009).
10. Trott, O. & Olson, A. J. AutoDock Vina: improving the speed and accuracy of docking with a new scoring function, efficient optimization, and multithreading. *J. Comput. Chem.* **31**, 455–461 (2010).
11. Bernardó, P., Mylonas, E., Petoukhov, M. V., Blackledge, M. & Svergun, D. I. Structural characterization of flexible proteins using small-angle X-ray scattering. *J. Amer. Chem. Soc.* **129**, 5656–5664 (2007).
12. Svergun, D., Barberato, C. & Koch, M. H. J. CRY SOL – A program to evaluate x-ray solution scattering of biological macromolecules from atomic coordinates. *J. Appl. Crystallogr.* **28**, 768–773 (1995).
13. Laskowski, R. A. & Swindells, M. B. LigPlot+: multiple ligand–protein interaction diagrams for drug discovery. *J. Chem. Inf. Model.* **51**, 2778–2786 (2011).
14. Meroueh, S.O. *et al.* Three dimensional structure of the bacterial cell wall peptidoglycan. *Proc. Natl. Acad. Sci. USA.* **103**, 4404–4409 (2006).
15. Salentin, S., Schreiber, S., Haupt, V. J., Adasme, M. F. & Schroeder, M. PLIP: fully automated protein-ligand interaction profiler. *Nucl. Acids Res.* **43** (W1), W443–W447 (2015).

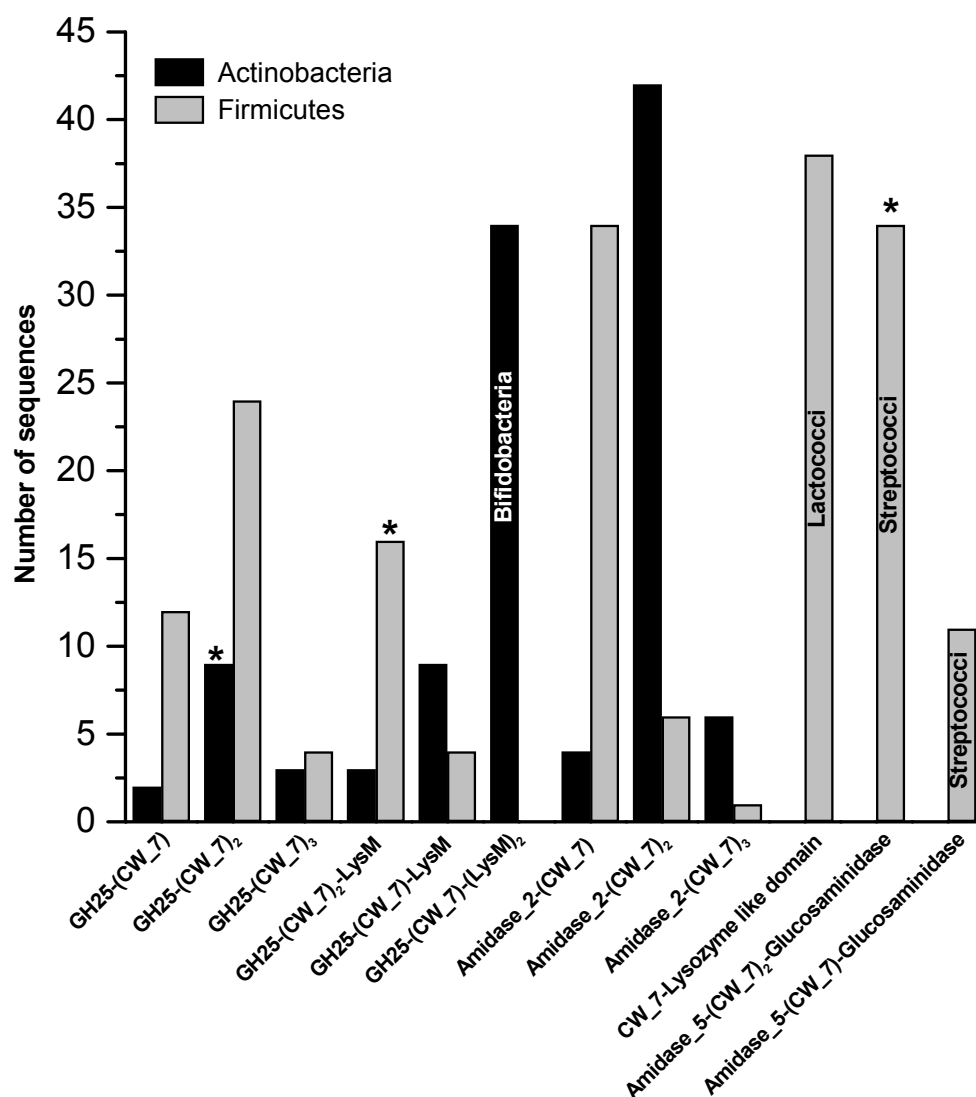

**Supplementary Figure S1. Frequency of most populated architectures carrying CW<sub>7</sub> repeats in the Actinobacteria and Firmicutes phyla.** Generally, repeats from Actinobacteria are three amino acids shorter than those from Firmicutes. However, repeats of GH25-(CW<sub>7</sub>)<sub>2</sub>-LysM and Amidase<sub>5</sub>-(CW<sub>7</sub>)<sub>2</sub>-Glucosaminidase architectures are almost all short, and those of GH25-(CW<sub>7</sub>)<sub>2</sub> long, independently of their origin (deviations from general rule are marked with asterisks). Coexistence of long and short repeats only appears in Amidase<sub>2</sub>-(CW<sub>7</sub>)<sub>2</sub> sequences.

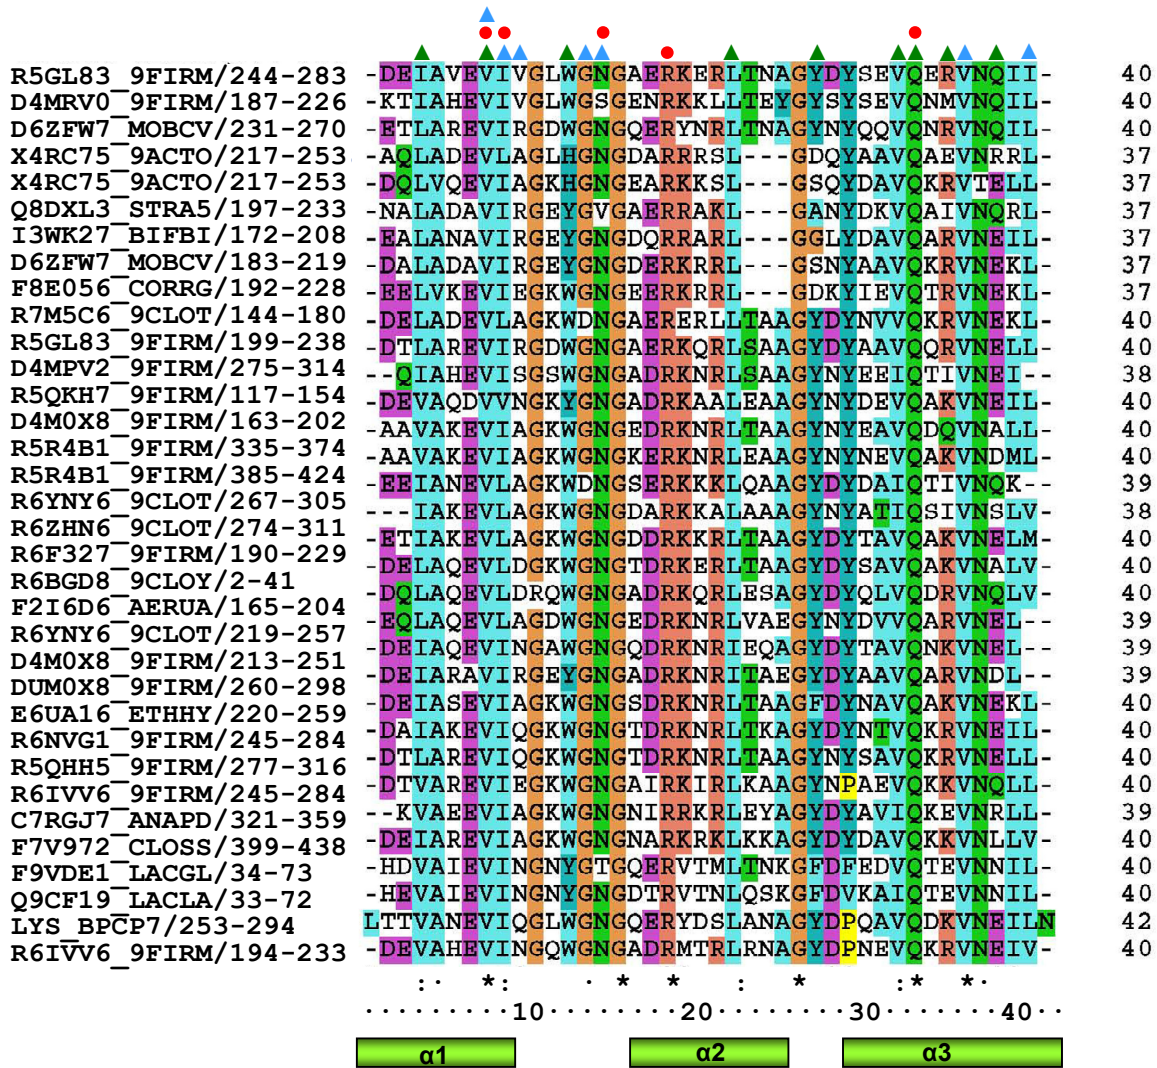

**Supplementary Figure S2. Sequence conservation in the CW<sub>7</sub> motifs.** Alignment of representative sequences of the CW<sub>7</sub> motif (Pfam PF08230; InterPro IPR013168). The UNIPROT accession code is shown. Asterisk, colons and dots indicate strictly conserved residues, conservative, and semi-conservative substitutions, respectively. Coloured mark-up is glycine (orange), proline (yellow), small hydrophobic (light blue); tyrosine and histidine (dark blue); hydroxyl an neutral polar (green); acidic (magenta); and basic (red). Relevant residues for bundle stabilization are indicated by green triangles; and those involved in GMDP binding by red circles (hydrogen-bonds) or blue triangles (hydrophobic contacts). Green cylinders indicate  $\alpha$ -helix positions in R2 crystal structure.

a

# Amidase\_2-(CW\_7)<sub>2</sub>

- Streptococcus constellatus subsp. Pharyngitis
- Streptococcus italicus
- Eubacteriaceae bacterium
- Eubacteriaceae bacterium
- Alloporium minutum
- Actinobacterium massiliense
- Actinobacterium massiliense
- Actinomycetes urogenitalis
- Actinomycetes nealii
- Actinomycetes nealii
- Varibaculum cambriense
- Varibaculum cambriense
- Varibaculum cambriense
- Mobiluncus curtisii
- Mobiluncus curtisii
- Mobiluncus curtisii subsp. Curtisii
- Mobiluncus curtisii subsp. Curtisii
- Mobiluncus mulleris
- Bifidobacterium bifidum
- Bifidobacterium bifidum
- Bifidobacterium kashiwanotense
- Bifidobacterium pseudolongum
- Bifidobacterium dentium
- Bifidobacterium breve
- Bifidobacterium breve
- Corynebacterium vitae
- Corynebacterium vitae
- Corynebacterium vitae
- Corynebacterium jeikeium
- Corynebacterium resistens
- Corynebacterium resistens
- Corynebacterium resistens
- Dermabacter hominis
- Propionimicrobium lymphophilum
- Propionimicrobium lymphophilum
- Propionimicrobium lymphophilum
- Trueperella bernardiae
- Trueperella pyogenes
- Trueperella pyogenes
- Chlamydia trachomatis
- Chlamydia trachomatis
- Chlamydia trachomatis

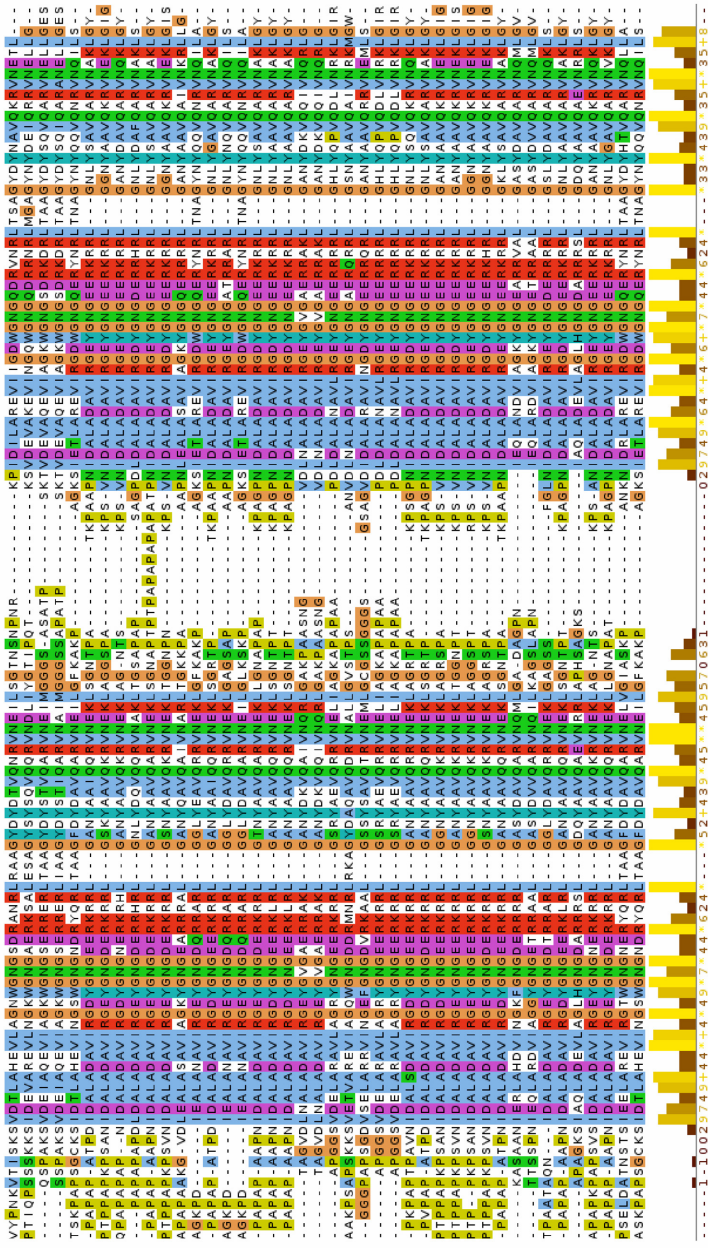

Conservation

Quality

Consensus

b

# Amidase\_2-(CW\_7)<sub>3</sub>

- Enterococcus casseliflavus
- Actinomycetes turicensis
- Mobiluncus curtisii subsp. homiesii
- Anthrobacter phage CapnMurtica
- Trueperella pyogenes
- Bifidobacterium scardovii

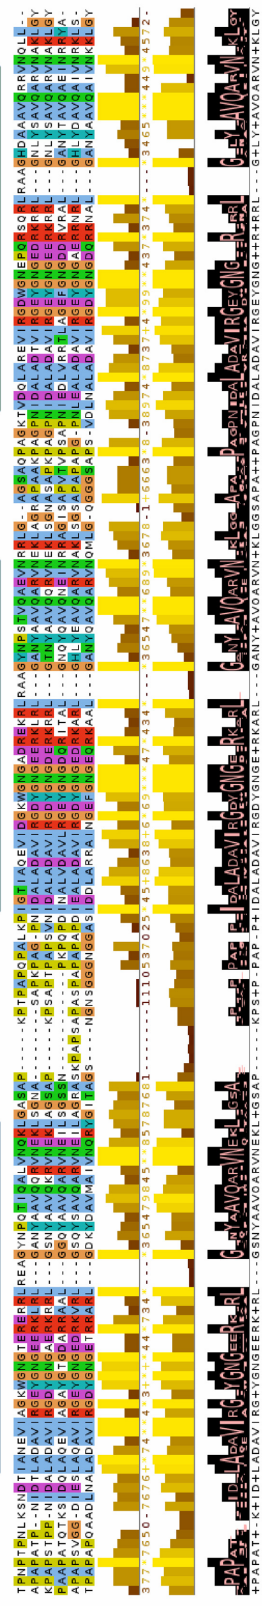

Conservation

Quality

Consensus



c

# GH25-(CW\_7)<sub>2</sub>

Streptococcus mitis SK579  
 Streptococcus sp. M334  
 Lactobacillus casei  
 Lactobacillus reuteri ATCC55730  
 Lactobacillus johnsonii DPC 6026  
 Lactobacillus antri DSM 16041  
 Lactobacillus gasseri  
 Lactobacillus panis DSM 6035  
 Lactobacillus frumenti DSM 13145  
 Lachnospiraceae bacterium TF01-11  
 Ruminococcus gnavis ATCC29149  
 Coprococcus sp. CAG:131  
 Coprococcus sp. ART15571  
 Coprococcus eutactus CAG:665  
 Coprococcus eutactus ATCC 27759  
 Coprococcus eutactus  
 Coprococcus eutactus  
 Coprococcus eutactus  
 Coprococcus eutactus  
 Erysipelothrix sp. LV19  
 Eubacterium sp. CAG:786  
 uncultured bacterium  
 Gardnerella vaginalis  
 Gardnerella vaginalis JCP8017A  
 Gardnerella vaginalis JCP7276  
 Gardnerella vaginalis JCP7719  
 Gardnerella vaginalis HMP9331  
 Gardnerella vaginalis 5-1  
 Gardnerella vaginalis AMD  
 Gardnerella vaginalis  
 Atopobium minutum 10063974  
 Chlamydia trachomatis

Conservation  
 Quality  
 Consensus

d

# GH25-(CW\_7)<sub>3</sub>

Streptococcus phage Cp-7  
 Streptococcus anginosus SK1138  
 Clostridium sp. M62  
 Coriobacteriaceae bacterium CHK1002  
 Olsenella profusa P0199  
 Olsenella uli M5T85

Conservation  
 Quality  
 Consensus

# GH25-(CW\_7)<sub>2</sub>-LysM

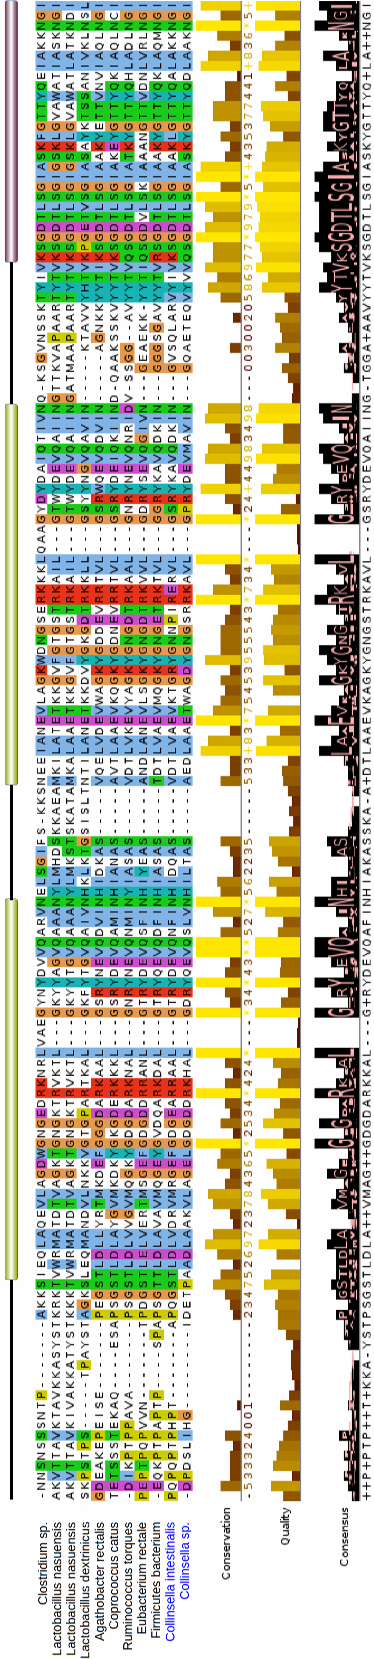

# f GH25-CW\_7-(LysM)<sub>2</sub>

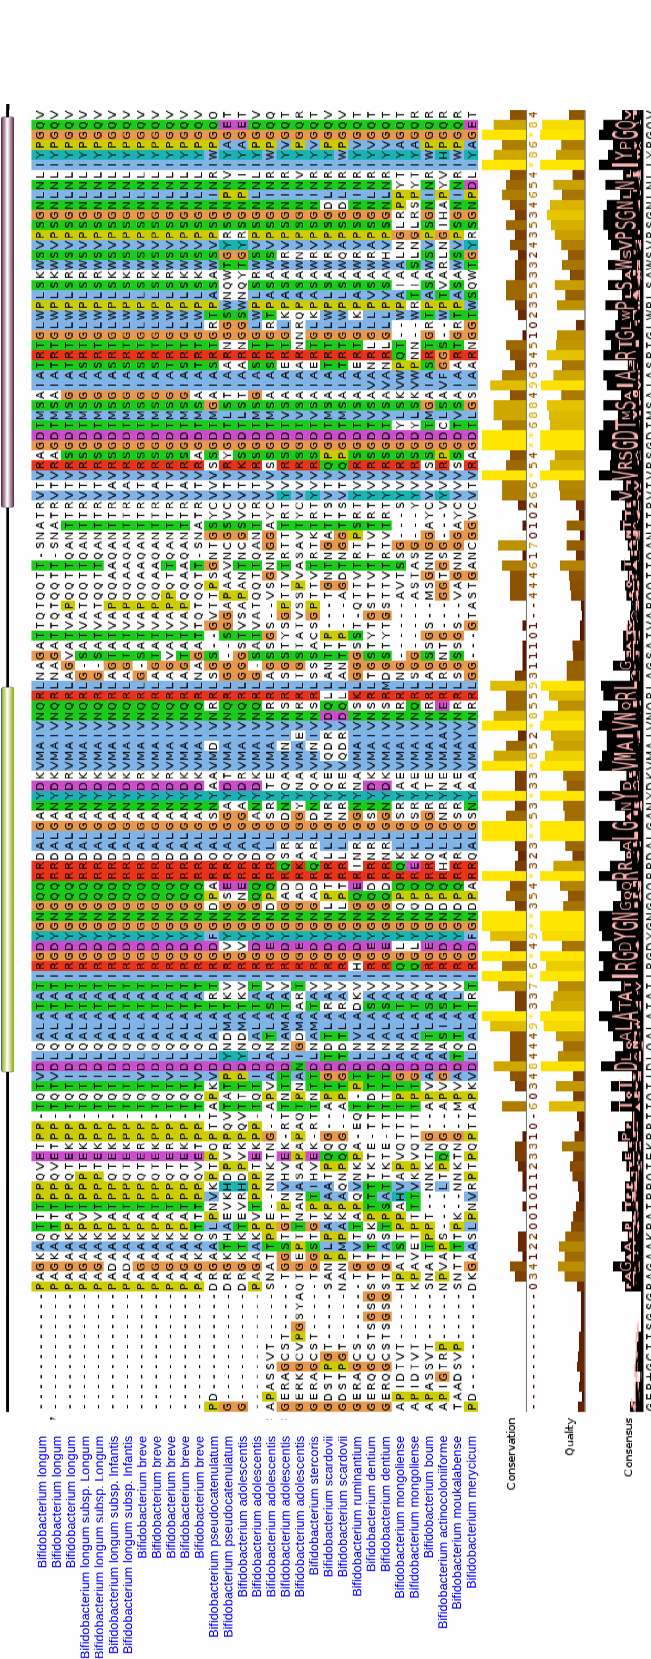

**Supplementary Figure S3. Alignments of CW\_7 repeats and interconnecting linkers of sequences comprised in architectures of (a) Amidase\_2-(CW\_7)<sub>2</sub> (b) Amidase\_2-(CW\_7)<sub>3</sub>, (c) GH25-(CW\_7)<sub>2</sub>, (d) GH25-(CW\_7)<sub>3</sub>, (e) GH25-(CW\_7)<sub>2</sub>-LysM and (f) GH25-(CW\_7)-LysM<sub>2</sub>.** Coding bacteria are indicated in blue for Actinobacteria, black for Firmicutes and red for Clamydia. Changing patterns in amino acid distribution among repeats of the same sequence, repeats of different architectures, and inter-repeat connecting linkers are highlighted by colouring residues as in Supplementary Fig. S3. Linkers connecting CW\_7 repeats in Amidase\_2-(CW\_7)<sub>2/3</sub> sequences are rich in prolines and/or glycines and largely differ from those of GH25-(CW\_7)<sub>2/3</sub> sequences. Amidase\_2-(CW\_7)<sub>3</sub> sequences in which short and long repeats coexist are indicated by arrows (panel a).

### Cpl-7 wt

MVKKNDLFVDVASHQGYDISGILEEAGTTNTIIKVSESTSYLNPCLSAQVSQSNPIGFYHFAWFGGNEEEAEA  
EARYFLDNVPTQVKYLVLDYEDHASASVQRNTTACLRFMQIIAEAGYTPIIYYSYKPF<sup>R1</sup>TLDNVDYQQILAQFPN  
SLWIAGYGLNDGTANFEYFPSMDGIRWWQYSSNPF<sup>R2</sup>DKNIVLLDDEKEDNINNENTLKS<sup>R3</sup>LTTVANEVIQGLWGN  
GQERYDSL<sup>R1</sup>ANAGYDPQAVQDKVNEILNAREIADLTTVANEVIQGLWNGQERYDSL<sup>R1</sup>ANAGYDPQAVQDKVNEI  
LNAREIADLTTVANEVIQGLWNGQERYDSL<sup>R1</sup>ANAGYDPQAVQDKVNELLS

### Cpl-7Δ1

MVKKNDLFVDVASHQGYDISGILEEAGTTNTIIKVSESTSYLNPCLSAQVSQSNPIGFYHFAWFGGNEEEAEA  
EARYFLDNVPTQVKYLVLDYEDHASASVQRNTTACLRFMQIIAEAGYTPIIYYSYKPF<sup>R1</sup>TLDNVDYQQILAQFPN  
SLWIAGYGLNDGTANFEYFPSMDGIRWWQYSSNPF<sup>R2</sup>DKNIVLLDDEKEDNINNENTLKS<sup>R3</sup>LTTVANEVIQGLWGN  
GQERYDSL<sup>R1</sup>ANAGYDPQAVQDKVNEILNAREIADLTTVANEVIQGLWNGQERYDSL<sup>R1</sup>ANAGYDPQAVQDKVNEI  
LS

### Cpl-7Δ2

MVKKNDLFVDVASHQGYDISGILEEAGTTNTIIKVSESTSYLNPCLSAQVSQSNPIGFYHFAWFGGNEEEAEA  
EARYFLDNVPTQVKYLVLDYEDHASASVQRNTTACLRFMQIIAEAGYTPIIYYSYKPF<sup>R1</sup>TLDNVDYQQILAQFPN  
SLWIAGYGLNDGTANFEYFPSMDGIRWWQYSSNPF<sup>R2</sup>DKNIVLLDDEKEDNINNENTLKS<sup>R3</sup>LTTVANEVIQGLWGN  
GQERYDSL<sup>R1</sup>ANAGYDPQAVQDKVNELLS

### C-Cpl-7 wt

ENTLKS<sup>R3</sup>LTTVANEVIQGLWNGQERYDSL<sup>R1</sup>ANAGYDPQAVQDKVNEILNAREIADLTTVANEVIQGLWNGQER  
YDSL<sup>R1</sup>ANAGYDPQAVQDKVNEILNAREIADLTTVANEVIQGLWNGQERYDSL<sup>R1</sup>ANAGYDPQAVQDKVNELLS

### R<sub>1-2</sub>

GEFNNTLKS<sup>R3</sup>LTTVANEVIQGLWNGQERYDSL<sup>R1</sup>ANAGYDPQAVQDKVNEILNAREIADLTTVANEVIQGLW  
NGQERYDSL<sup>R1</sup>ANAGYDPQAVQDKVNEILNAREIADLTTV

### N-Cpl-7

MVKKNDLFVDVASHQGYDISGILEEAGTTNTIIKVSESTSYLNPCLSAQVSQSNPIGFYHFAWFGGNEEEAEA  
EARYFLDNVPTQVKYLVLDYEDHASASVQRNTTACLRFMQIIAEAGYTPIIYYSYKPF<sup>R1</sup>TLDNVDYQQILAQFPN  
SLWIAGYGLNDGTANFEYFPSMDGIRWWQYSSNPF<sup>R2</sup>DKNIVLL

**Supplementary Figure S4. Amino acid sequences of proteins used in this work.** The one letter amino acid code is highlighted using the colour code of Fig. 1 to identify the catalytic domain (green) and the three CW<sub>7</sub> repeats of the cell wall binding domain (R1: blue; R2: orange; and R3: yellow). Residues mutated to alanine in C-Cpl-7R, C-Cpl-7Q and C-Cpl-7I are highlighted in grey, red and cyan, respectively, in the C-Cpl-7 wt sequence. Those left at the beginning of the R<sub>1-2</sub> fragment by the cut of LSLt-C-Cpl-7wt fusion protein with the TEV protease are highlighted in light blue.

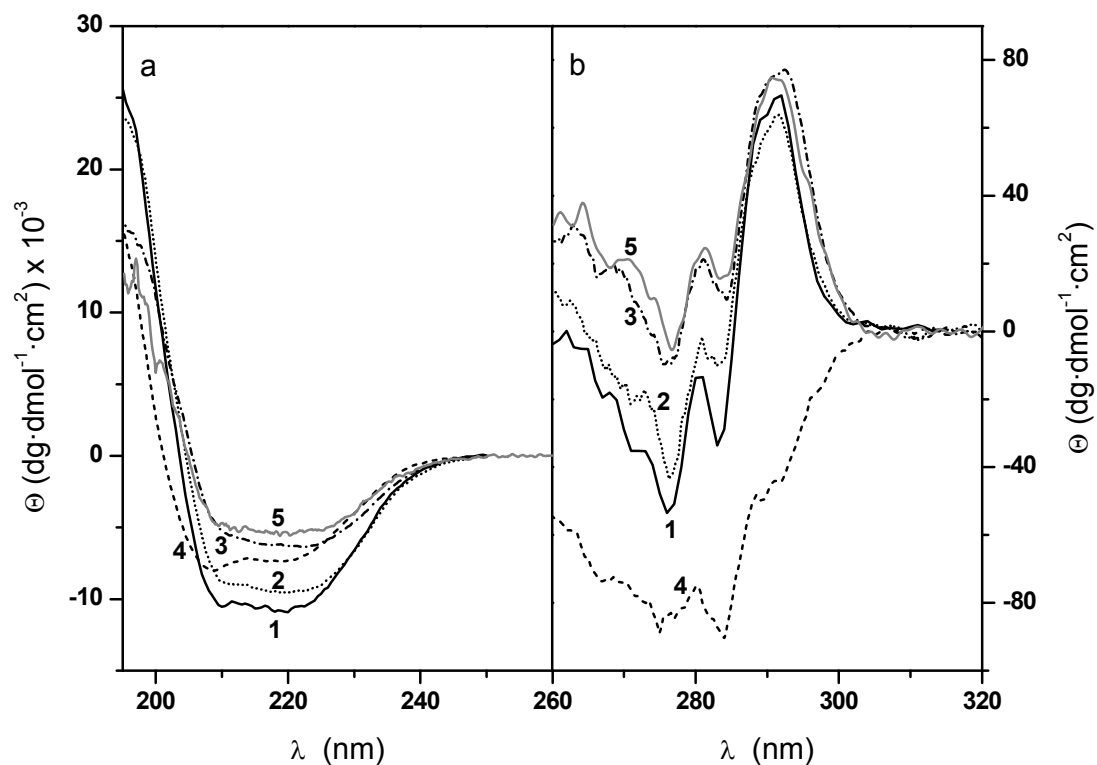

**Supplementary Figure S5. Comparison of the CD spectra of Cpl-7 and its separate domains with those of the CW<sub>7</sub> deletion mutants.** (a) Far- and (b) near-UV CD spectra of Cpl-7 wt (1), Cpl-7Δ1 (2), Cpl-7Δ2 (3), and C-Cpl-7 wt (4) and N-Cpl-7 (5) in PB buffer, pH 7.0, at 20 °C. Average molar ellipticities per residue are weighted by the fractional contribution of respective sequences in the full-length protein Cpl-7.

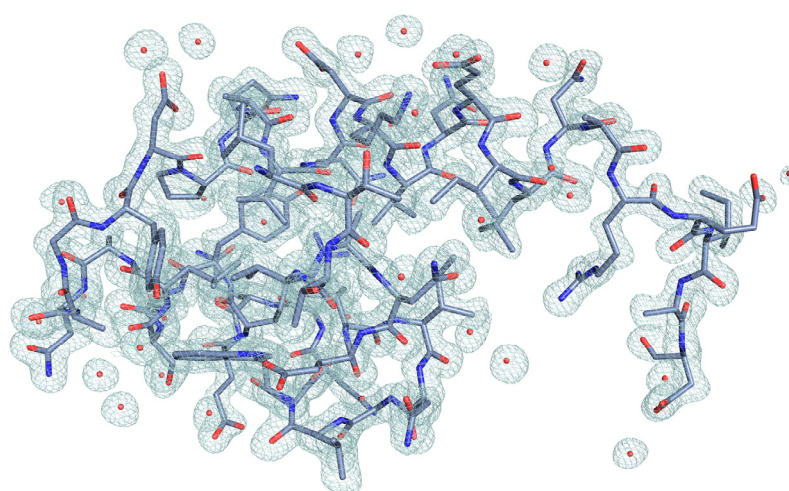

**Supplementary Figure S6. 2Fo-Fc electron density map of the single repeat (R2) contoured at 1  $\sigma$  in the unit-cell of R<sub>1-2</sub> crystals.** The protein is represented in sticks, waters as red spheres and the grid is depicted in pale blue.

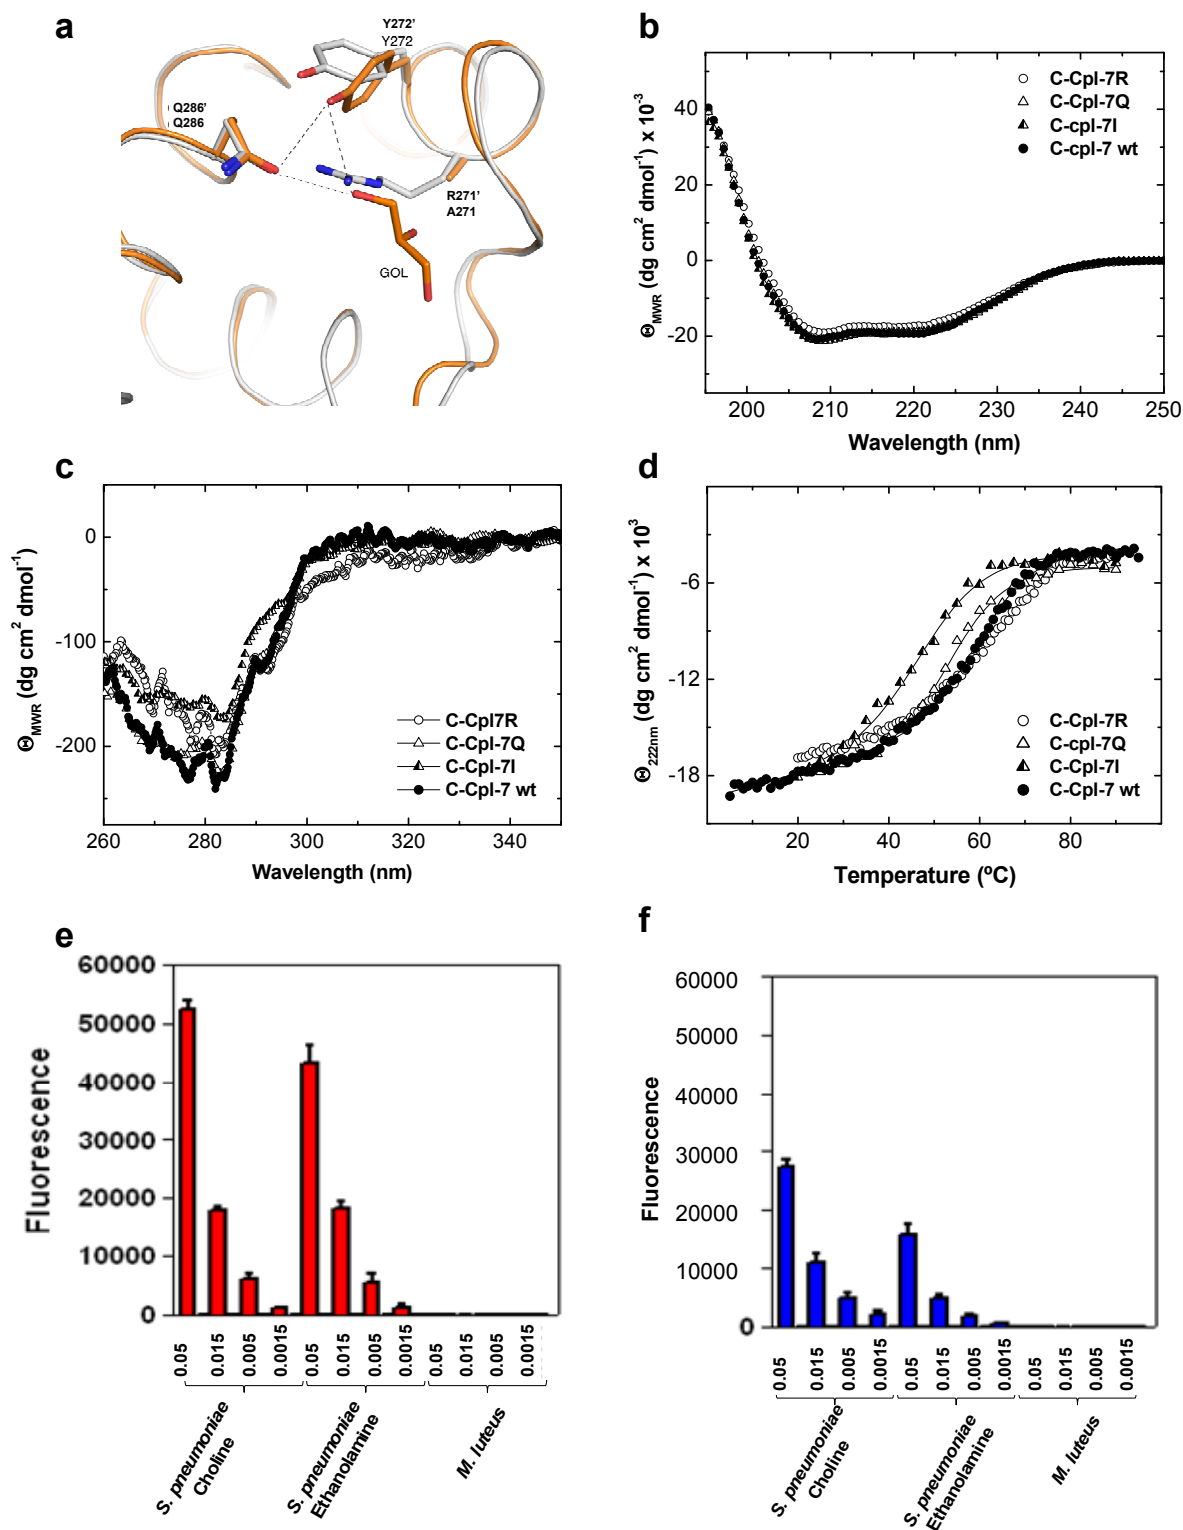

**Supplementary Figure S7. Effect of the triple arginine-to-alanine mutation on C-Cpl-7 structure and cell wall-binding activity.** (a) Superimposition of R2 structure from full-length C-Cpl-7R (orange) and the R<sub>1-2</sub> fragment (white); residues affected by the mutation are in stick representation. Loss of the cation- $\pi$  interaction between Tyr272 and Arg271 in C-Cpl-7R approached side chains of Tyr272 and Gln286 to hydrogen-bond distance, which probably explains the differences found in the near-CD spectra of panel (c). One molecule of glycerol (labelled as GOL) forms hydrogen bonds with both residues. (b) and (c) Far- and near-UV CD spectra of C-Cpl-7 wt and triple mutants in PB buffer at 20  $^{\circ}\text{C}$ . (d) Thermal denaturation profiles of these constructs in PB. Solid traces are the theoretical fits of data to a two-state reversible denaturation model with  $T_m$  and  $\Delta H_d$  values summarized in Supplementary Table S4. (e) and (f) Microarray binding assays of C-Cpl-7 wt and C-Cpl-7R, respectively, to purified cell walls of *S. pneumoniae* (grown in choline- or ethanolamine-containing media) or *Micrococcus luteus* (negative control) immobilized at four different doses (mg/ml). Substitution of choline by alanine has little or no effect on C-Cpl-7 binding.

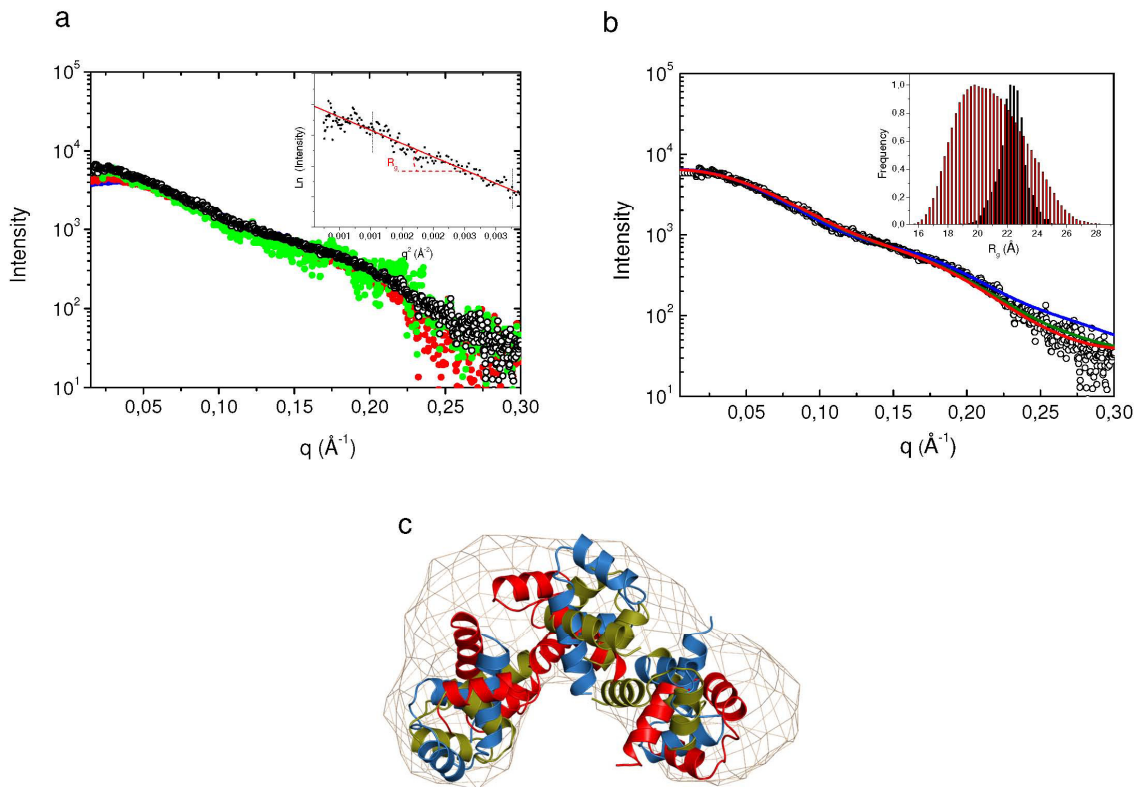

**Supplementary Figure S8. SAXS profiles and 3D modelling of C-Cpl-7 wt in solution.** (a) Extrapolation of C-Cpl-7 profiles to infinite dilution (black line) using the spectra recorded at 7.6, 3.8 and 1.9 mg/ml (blue, green and red dots, respectively). The inset shows the estimation of the radius of gyration ( $R_g$ ) from the Guinier plot at infinite dilution. (b) Analysis of SAXS data using EOM<sup>12</sup>. The inset shows the broad  $R_g$  distribution of the starting pool of 10,000 random configurations (red bars) and the narrow distribution of the sub-ensemble of models selected by EOM (black bars). (c) Cartoon representation of a sub-ensemble of three C-Cpl-7 models selected by EOM superimposed with the *ab initio* envelope generated with DAMMIF (grey mesh). The theoretical spectra (blue, green and red traces) calculated with CRY SOL<sup>13</sup> from EOM models are compared with the experimental profile in panel (b).

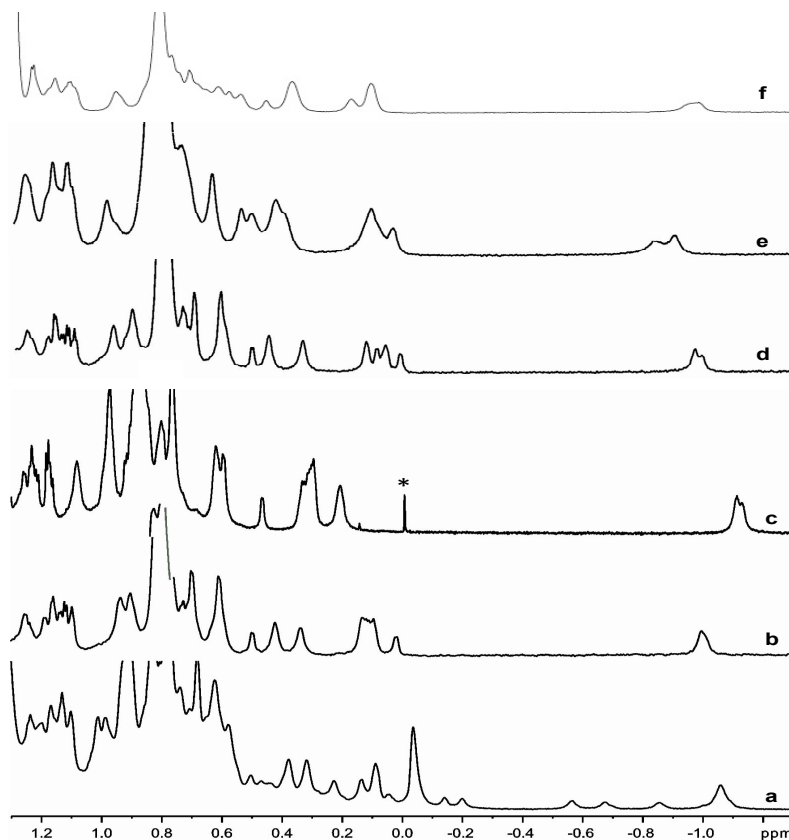

**Supplementary Figure S9. Comparison of the high field region (1.3 to -1.3 ppm) of the  $^1\text{H}$  NMR spectra (800 MHz) in PB-D<sub>2</sub>O buffer of (a) Cpl-7 full length, (b) C-Cpl-7 wt, and (c) C-Cpl-7R, (d) C-Cpl-7, (e) C-Cpl-7I and (f) C-Cpl-7I in the presence of GMDP. The asterisk indicates the signal corresponding to the chemical shift reference (4,4-dimethyl-4-silapentane-1-sulfonic acid) added to the sample.**

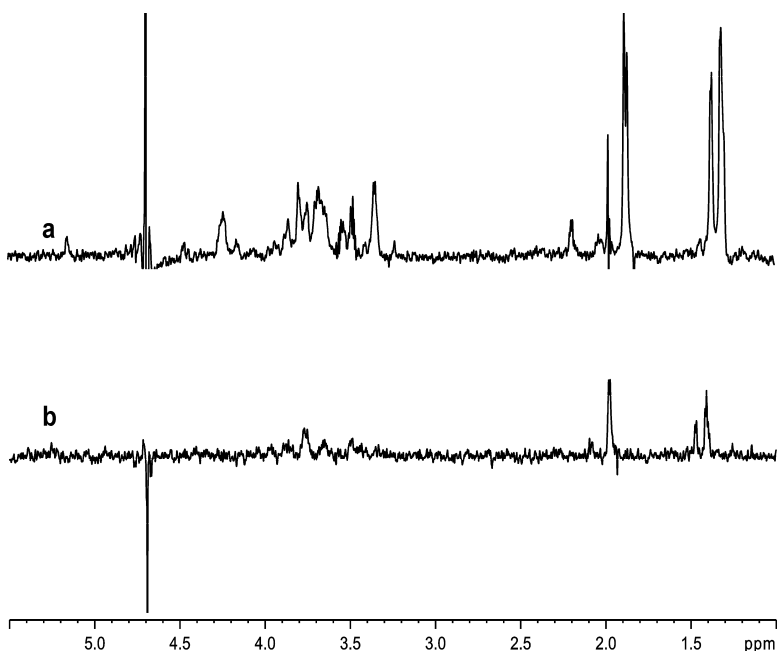

**Supplementary Figure S10. Exposure to high salt conditions impairs GMDP recognition by C-Cpl-7 wt.** The STD spectra (methyl irradiation) of GMDP in the presence of C-Cpl-7 wt became extremely weak on passing from (a) PB-D<sub>2</sub>O buffer ( $I = 0.044$ ;  $\text{pD} = 7.1$ ) to (b) 0.25 M pyrophosphate, 1.5 M KCl ( $I = 3.3$ ;  $\text{pD} = 8.6$ ). NMR conditions were the same for both samples.



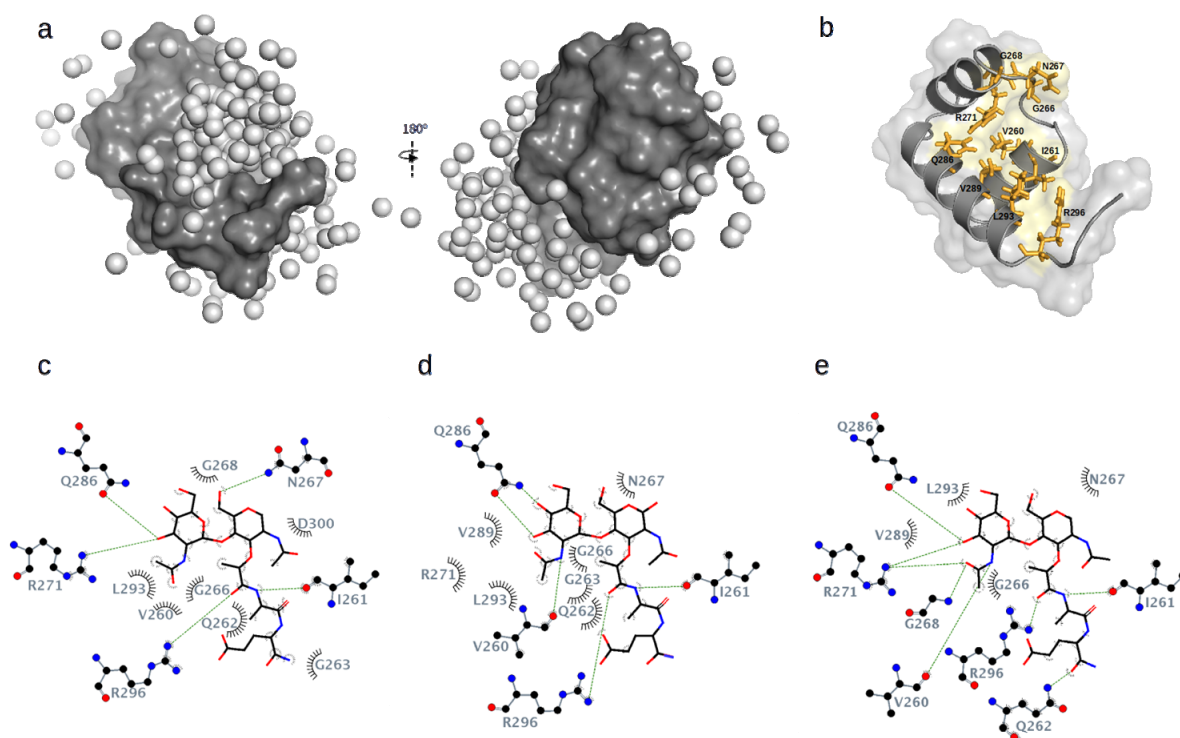

**Supplementary Figure S11. GMDP docking into a CW<sub>7</sub> motif of Cpl-7.** (a) Two different views of the blind docking performed with the AutoDock4.2 program. The receptor surface is coloured in grey and the relative positions of the MurNAc and GlcNAc units of GMDP are indicated by spheres. (b) View of the GMDP binding surface. Relevant residues for ligand recognition inferred from the best docking models generated with AutoDock Vina, CRDOCK, DOCK6 and AutoDock4 are shown in stick representation (R2 sequence numbering). LigPlot<sup>14</sup> representations of contacts between GMDP and the R2 repeat of Cpl-7 wt in the best docking models of (c) AutoDock Vina, (d) CRDOCK and (e) DOCK6. Dashed lines indicate the hydrogen bonds and the black arcs van der Waals interactions.

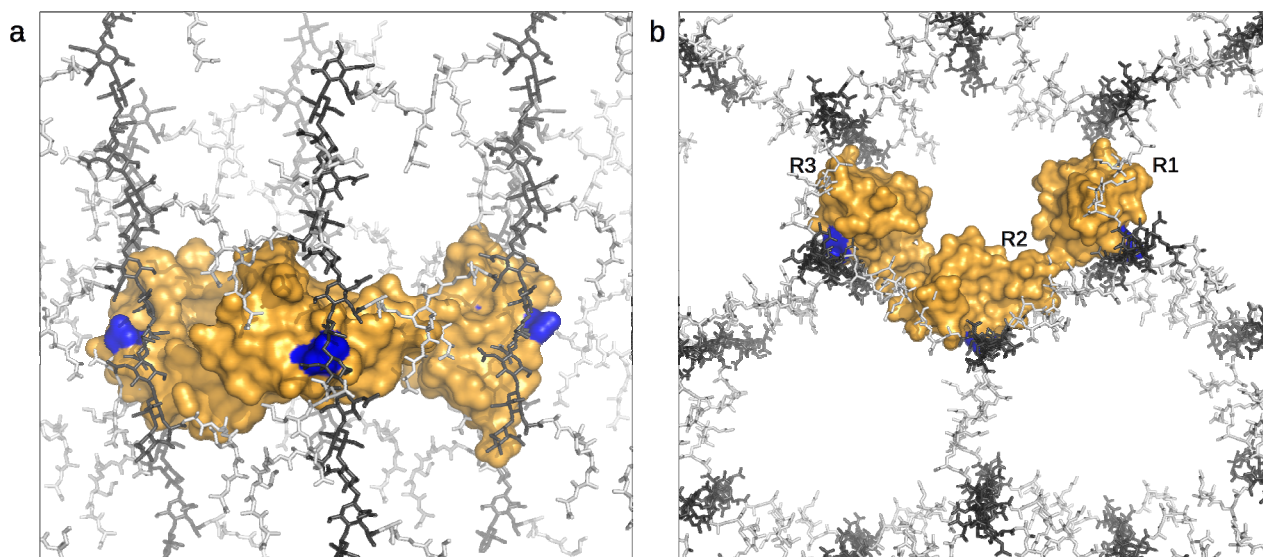

**Supplementary Figure S12. Views from the side (a) and above (b) of the SAXS based model of C-Cpl-7 superimposed into a pore of the NMR-based structure of the cell wall proposed by Meroueh *et al.*<sup>15</sup>. The glycan strands (black) and the peptide stems (grey) are shown in stick representation. The C-Cpl-7 domain (surface representation) is shown in orange with the position of the GMDP binding comprised in each repeat highlighted in blue. Their dispositions are compatible with a 1:3 domain-to-ligand stoichiometry involving three different glycan chains.**

## Supplementary Tables

| <b>Supplementary Table S1   Sedimentation coefficients (<math>s_{20,w}</math>), Stokes' radii (<math>R_s</math>) and frictional coefficients (<math>ff_0</math>) of Cpl-7 and the repeat deletion mutants measured by sedimentation velocity at 20 °C.</b> |                   |              |        |
|------------------------------------------------------------------------------------------------------------------------------------------------------------------------------------------------------------------------------------------------------------|-------------------|--------------|--------|
| Protein                                                                                                                                                                                                                                                    | $s_{20,w}$<br>(S) | $R_s$<br>(Å) | $ff_0$ |
| Cpl-7 wt                                                                                                                                                                                                                                                   | 2.73              | 34.1         | 1.51   |
| Cpl-7Δ1                                                                                                                                                                                                                                                    | 2.53              | 31.8         | 1.48   |
| Cpl-7Δ2                                                                                                                                                                                                                                                    | 2.42              | 27.9         | 1.37   |

| Supplementary Table S2   <sup>1</sup> H chemical shift data (ppm) of D-GlcNAc-(β 1-4)-D-MurNAc-L-Ala-D-isoGln (GMDP) at 25 °C in PB-D <sub>2</sub> O |                |            |
|------------------------------------------------------------------------------------------------------------------------------------------------------|----------------|------------|
| Proton                                                                                                                                               | Chemical shift |            |
| GlcNAc-1                                                                                                                                             | 4.47           |            |
| GlcNAc-2                                                                                                                                             | 3.68           |            |
| GlcNAc-3                                                                                                                                             | 3.49           |            |
| GlcNAc-4                                                                                                                                             | 3.35           |            |
| GlcNAc-5                                                                                                                                             | 3.36           |            |
| GlcNAc-6                                                                                                                                             | 3.70           |            |
| GlcNAc-6'                                                                                                                                            | 3.87           |            |
| GlcNAc-(CH <sub>3</sub> )                                                                                                                            | 1.98           |            |
| GlcNAc-(NH)                                                                                                                                          | 8.34           |            |
|                                                                                                                                                      | α-anomer       | β-anomer   |
| MurNAc-1                                                                                                                                             | 5.16           | 4.57       |
| MurNAc-2                                                                                                                                             | 3.77           | 3.65       |
| MurNAc-3                                                                                                                                             | 3.79           | 3.54       |
| MurNAc-4                                                                                                                                             | 3.69           | 3.79       |
| MurNAc-5                                                                                                                                             | n.a.           | 3.41       |
| MurNAc-6                                                                                                                                             | 3.65           | 3.62       |
| MurNAc-6'                                                                                                                                            | 3.75           | 3.82       |
| MurNAc-(CH <sub>3</sub> )                                                                                                                            | 1.89           | 1.87       |
| MurNAc-(NH)                                                                                                                                          | 7.89           | 7.67       |
| D-Lac-α                                                                                                                                              | 4.49           | 4.36       |
| D-Lac-β                                                                                                                                              | 1.32           | 1.30       |
| L-Ala-NH                                                                                                                                             | 8.36           | 8.24       |
| L-Ala-α                                                                                                                                              | 4.24           | 4.23       |
| L-Ala-β                                                                                                                                              | 1.38           | 1.38       |
| D-iGln-NH                                                                                                                                            | 8.49           | 8.54       |
| D-isoGln-α                                                                                                                                           | 4.26           | 4.28       |
| d-isoGln-NH2                                                                                                                                         | 7.61, 7.04     | 7.66, 7.07 |
| d-isoGln-β                                                                                                                                           | 2.04           | 2.04       |
| d-isoGln-β'                                                                                                                                          | 1.86           | 1.87       |
| D-isoGln-γ,γ'                                                                                                                                        | 2.24           | 2.24       |

**Supplementary Table S3 | Hydrogen bonds and hydrophobic contacts established between GMDP and the R2 repeat of C-Cpl-7 in the GMDP/R2 complex models generated by four different docking methods.<sup>1</sup>**

| Ligand unit                          | Residue | Distance<br>H-A<br>(Å) | Distance<br>D-A<br>(Å) | Angle<br>(degrees) | Protein<br>donor | Atoms <sup>2</sup>       |                             |
|--------------------------------------|---------|------------------------|------------------------|--------------------|------------------|--------------------------|-----------------------------|
| <b><u>AutoDock4.2 Solution</u></b>   |         |                        |                        |                    |                  |                          |                             |
| <b>Hydrogen bonds</b>                |         |                        |                        |                    |                  | <b>Donor<sup>3</sup></b> | <b>Acceptor<sup>3</sup></b> |
| GlcNAc                               | Val260  | 2.6                    | 3.5                    | 171.0              | No               | <b>N2</b>                | CO                          |
|                                      | Arg271  | 1.9                    | 2.8                    | 154.9              | Yes              | Nη2                      | <b>O2N</b>                  |
|                                      | Arg271  | 2.7                    | 3.0                    | 113.3              | Yes              | Nη2                      | <b>O3</b>                   |
|                                      | Gln286  | 2.5                    | 3.5                    | 173.3              | Yes              | Nε2                      | <b>O4</b>                   |
|                                      | Gln286  | 2.4                    | 3.2                    | 150.3              | No               | <b>O3</b>                | Oε1                         |
| MurNAc                               | Asn267  | 2.3                    | 3.3                    | 170.3              | No               | <b>O6</b>                | Oδ1                         |
| L-Ala                                | Ile261  | 2.1                    | 2.4                    | 131.7              | No               | <b>NH</b>                | CO                          |
| <b>Salt bridge</b>                   |         |                        |                        |                    |                  |                          |                             |
| D-IsoGln                             | Arg296  | 1.7                    | 2.7                    | 171.4              | –                | Nη1                      | <b>Oε1</b>                  |
| <b>Hydrophobic contacts</b>          |         |                        |                        |                    |                  |                          |                             |
| GlcNAc                               | Gly266  |                        |                        |                    |                  | <b>C2N</b>               | Cα                          |
|                                      | Val289  |                        |                        |                    |                  | <b>C3</b>                | C2                          |
| MurNAc                               | Arg296  |                        |                        |                    |                  | <b>Cβ (lactyl)</b>       | Cδ                          |
| L-Ala                                | Gln262  |                        |                        |                    |                  | <b>Cβ</b>                | Cα                          |
|                                      | Ile261  |                        |                        |                    |                  | <b>Cβ</b>                | Cγ2                         |
| D-isoGln                             | Arg296  |                        |                        |                    |                  | <b>Cγ</b>                | Cδ                          |
| <b><u>AutoDock Vina Solution</u></b> |         |                        |                        |                    |                  |                          |                             |
| <b>Hydrogen bonds</b>                |         |                        |                        |                    |                  | <b>Donor</b>             | <b>Acceptor</b>             |
| GlcNAc                               | Arg271  | 2.7                    | 3.1                    | 104.1              | Yes              | Nη2                      | <b>O3</b>                   |
|                                      | Gln286  | 3.4                    | 3.8                    | 108.4              | No               | <b>O3</b>                | Oε1                         |
| MurNAc                               | Asn267  | 2.6                    | 2.9                    | 106.1              | Yes              | Nδ2                      | <b>O6</b>                   |
|                                      | Arg296  | 2.5                    | 3.2                    | 138.7              | Yes              | Nη1                      | <b>CO (lactyl)</b>          |
| L-Ala                                | Ile261  | 2.1                    | 3.0                    | 147.9              | No               | <b>NH</b>                | CO                          |
| <b>Hydrophobic contacts</b>          |         |                        |                        |                    |                  |                          |                             |
| GlcNAc                               | Gly266  |                        |                        |                    |                  | <b>C2N</b>               | Cα                          |
|                                      | Leu293  |                        |                        |                    |                  | <b>C4</b>                | Cδ2                         |
|                                      | Val260  |                        |                        |                    |                  | <b>C2N</b>               | Cγ2                         |
| MurNAc                               | Asp300  |                        |                        |                    |                  | <b>Cβ (lactyl)</b>       | Cβ                          |
| L-Ala                                | Gln262  |                        |                        |                    |                  | <b>Cβ</b>                | Cβ                          |
|                                      | Ile261  |                        |                        |                    |                  | <b>Cβ</b>                | Cγ2                         |
| D-IsoGln                             | Gly263  |                        |                        |                    |                  | <b>Cα</b>                | Cα                          |
| <b><u>CRDOCK Solution</u></b>        |         |                        |                        |                    |                  |                          |                             |
| <b>Hydrogen bonds</b>                |         |                        |                        |                    |                  | <b>Donor</b>             | <b>Acceptor</b>             |
| GlcNAc                               | Val260  | 2.2                    | 3.1                    | 167.5              | No               | <b>N2</b>                | CO                          |
|                                      | Gln286  | 2.9                    | 3.3                    | 111.4              | No               | <b>O3</b>                | Oη2                         |
|                                      | Gln286  | 2.3                    | 3.3                    | 170.1              | Yes              | NH                       | <b>O4</b>                   |
| MurNAc                               | Arg296  | 2.1                    | 3.0                    | 148.7              | Yes              | Nη1                      | <b>CO (lactyl)</b>          |
| L-Ala                                | Ile261  | 2.1                    | 2.9                    | 137.1              | No               | <b>NH</b>                | CO                          |
| <b>Hydrophobic contacts</b>          |         |                        |                        |                    |                  |                          |                             |

|                                                                                                                                                                                                                                    |        |     |     |       |     |                                     |                    |
|------------------------------------------------------------------------------------------------------------------------------------------------------------------------------------------------------------------------------------|--------|-----|-----|-------|-----|-------------------------------------|--------------------|
| GlcNAc                                                                                                                                                                                                                             | Val260 |     |     |       |     | <b>C2N</b>                          | C $\gamma$ 1       |
|                                                                                                                                                                                                                                    | Arg271 |     |     |       |     | <b>C2N</b>                          | C $\gamma$         |
|                                                                                                                                                                                                                                    | Gly266 |     |     |       |     | <b>C2N</b>                          | C $\alpha$         |
|                                                                                                                                                                                                                                    | Val289 |     |     |       |     | <b>C3</b>                           | C $\gamma$ 2       |
|                                                                                                                                                                                                                                    | Leu293 |     |     |       |     | <b>C<math>\beta</math> (lactyl)</b> | C $\delta$ 2       |
| MurNAc                                                                                                                                                                                                                             | Asn267 |     |     |       |     | <b>C6</b>                           | C $\beta$          |
|                                                                                                                                                                                                                                    | Ile261 |     |     |       |     | <b>C<math>\beta</math> (lactyl)</b> | C $\gamma$ 2       |
| L-Ala                                                                                                                                                                                                                              | Gln262 |     |     |       |     | <b>C<math>\beta</math></b>          | C $\gamma$         |
|                                                                                                                                                                                                                                    | Gly263 |     |     |       |     | <b>C<math>\beta</math></b>          | C $\alpha$         |
| <b><u>Dock6.3 Solution</u></b>                                                                                                                                                                                                     |        |     |     |       |     |                                     |                    |
| <b>Hydrogen bonds</b>                                                                                                                                                                                                              |        |     |     |       |     | <b>Donor</b>                        | <b>Acceptor</b>    |
| GlcNAc                                                                                                                                                                                                                             | Val260 | 3.0 | 3.9 | 151.2 | No  | <b>N2</b>                           | CO                 |
|                                                                                                                                                                                                                                    | Gly268 | 3.1 | 4.0 | 160.6 | Yes | NH                                  | <b>O2N</b>         |
|                                                                                                                                                                                                                                    | Arg271 | 2.2 | 3.1 | 151.5 | Yes | N $\eta$ 1                          | <b>O2N</b>         |
|                                                                                                                                                                                                                                    | Gln286 | 3.4 | 4.0 | 119.6 | No  | <b>O3</b>                           | O $\epsilon$ 1     |
|                                                                                                                                                                                                                                    | Arg271 | 2.2 | 3.3 | 131.3 | Yes | N $\eta$ 1                          | <b>O3</b>          |
| MurNAc                                                                                                                                                                                                                             | Arg296 | 2.3 | 3.0 | 131.8 | Yes | N $\eta$ 1                          | <b>CO (lactyl)</b> |
| L-Ala                                                                                                                                                                                                                              | Ile261 | 2.7 | 3.3 | 128.5 | No  | <b>NH</b>                           | CO                 |
| D-isoGln                                                                                                                                                                                                                           | Gln262 | 3.2 | 4.0 | 142.1 | Yes | N $\epsilon$ 2                      | <b>CO</b>          |
| <b>Hydrophobic contacts</b>                                                                                                                                                                                                        |        |     |     |       |     |                                     |                    |
| GlcNAc                                                                                                                                                                                                                             | Gly266 |     |     |       |     | <b>C2N</b>                          | C $\alpha$         |
|                                                                                                                                                                                                                                    | Leu293 |     |     |       |     | <b>C4</b>                           | C $\delta$ 2       |
|                                                                                                                                                                                                                                    | Val289 |     |     |       |     | <b>C3</b>                           | C $\gamma$ 2       |
| MurNAc                                                                                                                                                                                                                             | Asn267 |     |     |       |     | <b>C6</b>                           | C $\beta$          |
|                                                                                                                                                                                                                                    | Arg296 |     |     |       |     | <b>C<math>\beta</math> (lactyl)</b> | C $\delta$         |
| L-Ala                                                                                                                                                                                                                              | Ile261 |     |     |       |     | <b>C<math>\beta</math></b>          | C $\gamma$ 2       |
| <sup>1</sup> The analysis was performed with the PLIP server <sup>16</sup> and the Ligplot+ program <sup>14</sup> .<br><sup>2</sup> GMDP atoms are shown in bold.<br><sup>3</sup> Donor and acceptor apply only to hydrogen bonds. |        |     |     |       |     |                                     |                    |

| <b>Supplementary Table S4   Thermal stability and hydrodynamic parameters at 20 °C of C-Cpl-7 wt and its triple mutants</b> |               |                            |                   |              |         |  |
|-----------------------------------------------------------------------------------------------------------------------------|---------------|----------------------------|-------------------|--------------|---------|--|
| Protein                                                                                                                     | $T_m$<br>(°C) | $\Delta H_d$<br>(kcal/mol) | $S_{20,w}$<br>(S) | $R_s$<br>(Å) | $f/f_0$ |  |
| C-Cpl-7 wt                                                                                                                  | 60.6 ± 0.1    | 33.8 ± 0.5                 | 1.6               | 24.5         | 1.46    |  |
| C-Cpl-7R                                                                                                                    | 65.4 ± 0.2    | 31.1 ± 0.7                 | 1.5               | 25.3         | 1.54    |  |
| C-Cpl-7Q                                                                                                                    | 54.4 ± 0.5    | 35 ± 2                     | 1.6               | 24.0         | 1.42    |  |
| C-Cpl-7I                                                                                                                    | 48.8 ± 0.9    | 29 ± 1                     | 1.5               | 25.0         | 1.49    |  |
